# Supplementary material
Source: publisher figshare collection journal article supplement (https://frontiersin.figshare.com/ndownloader/files/34660747)
Supplement: Supplementary file 1 [file 34660747]

## Sheet: Table S2_major
TABLE S2: Major oxides concentrations (%) of sediments of Bay of Koper (cmbsf = centimeters bellow sediment floor).
Location	Depth (cmbsf)	Si	Al	Fe	Mg	Ca	K	Ti	Mn
KPF1	0-2	20.8275	5.64796	3.76017	1.64062	7.72288	2.23158	0.412222	0.03
	2-4	21.0211	5.92872	3.77385	1.81595	7.72676	2.22745	0.421677	0.04
	4-6	21.2668	5.92934	3.77404	1.95989	7.70837	2.1755	0.409393	0.04
	6-8	20.9358	5.73248	3.73348	1.75296	7.80256	2.20142	0.423433	0.04
	8-10	20.7477	5.68001	3.76096	1.72377	7.69499	2.18745	0.422854	0.03
KPF2	0-2	20.9027	5.76311	3.72713	1.83593	8.07511	2.15909	0.40848	0.03
	2-4	20.7586	5.63319	3.693	1.68741	8.2371	2.1511	0.409365	0.03
	4-6	20.8427	5.54217	3.74631	1.71831	8.25014	2.1482	0.40856	0.03
	6-8	21.2041	5.67005	3.67894	1.84844	8.24637	2.13404	0.418945	0.03
	8-10	21.0391	5.79833	3.70014	1.73897	8.22293	2.1705	0.424109	0.03
KPF3	0-2	20.0468	5.29801	3.3332	1.75708	8.25544	1.95208	0.386309	0.02
	2-4	20.4333	5.2053	3.21918	1.56305	8.05128	1.85663	0.391188	0.02
	4-6	21.0183	5.54429	3.41523	1.59711	7.8088	2.03385	0.42177	0.02
	6-8	21.1084	5.53218	3.4854	1.54491	7.59824	2.00181	0.427964	0.02
	8-10	21.1465	5.75229	3.5672	1.83054	7.57133	2.11661	0.402799	0.03
REF	0-2	19.53	5.65342	3.55582	2.26208	9.24637	2.1737	0.374926	0.03
	2-4	19.7596	5.74154	3.57603	1.76775	9.3598	2.23218	0.380958	0.03
	4-6	19.7332	5.6419	3.59883	1.97373	9.38573	2.21891	0.387947	0.03
	6-8	19.9566	5.81114	3.61177	2.11331	9.42883	2.25796	0.385511	0.03
	8-10	19.4233	5.52846	3.59466	2.17897	9.39844	2.2159	0.395373	0.03
Aver		20.5851	5.65169	3.61527	1.81554	8.28957	2.1423	0.405689	0.0295
Min		19.4233	5.2053	3.21918	1.54491	7.57133	1.85663	0.374926	0.02
Median		20.8351	5.66174	3.64536	1.76241	8.14902	2.1721	0.408963	0.03
